# Supplementary material
Source: publisher site journal article supplement (https://www.dovepress.com/article/424082)
Supplement: Supplementary file 1 [file get_supplementary_file.php]

**Supplemental Table 1: Count of patients with NPRS ≤ 1 at 30 minutes**

| **Time (min)** | **DPE (n=64)** | **EP (n=63)** | ***P* Value** |
| --- | --- | --- | --- |
| 2 | 4 (6.3) | 1 (1.6) | 0.365 |
| 4 | 11 (17.2) | 5 (7.9) | 0.116 |
| 6 | 17 (26.6) | 11 (17.5) | 0.216 |
| 8 | 25 (39.1) | 13 (20.6) | 0.023* |
| 10 | 32 (50.0) | 23 (36.5) | 0.125 |
| 12 | 39 (60.9) | 26 (41.3) | 0.027* |
| 14 | 44 (68.8) | 30 (47.6) | 0.016* |
| 16 | 48 (75.0) | 36 (57.1) | 0.033* |
| 18 | 51 (79.7) | 41 (65.1) | 0.065 |
| 20 | 52 (81.3) | 46 (73.0) | 0.269 |
| 22 | 52 (81.3) | 47(74.6) | 0.366 |
| 24 | 52 (81.3) | 47(74.6) | 0.366 |
| 26 | 52 (81.3) | 47(74.6) | 0.366 |
| 28 | 52 (81.3) | 47(74.6) | 0.366 |
| 30 | 52 (81.3) | 47(74.6) | 0.366 |

**Notes:** Data are present as n (%). *, statistically significant.

**Abbreviations:** NPRS, numeric pain rating scale; DPE, dural puncture epidural; EP, conventional epidural.
